# Supplementary material for: The controlled relay of multiple protons required at the active site of nitrogenase
Source: Royal Society of Chemistry journal article supplement (doi:10.1039/c2dt30518f), 2012-01-01
Supplement: c2dt30518f.pdf [file c2dt30518f.pdf]

DT-ART-03-2012-030518

## The controlled relay of multiple protons required at the active site of nitrogenase.

Ian Dance

School of Chemistry, University of New South Wales, Sydney 2052, Australia

Email: i.dance@unsw.edu.au

### Supplementary material

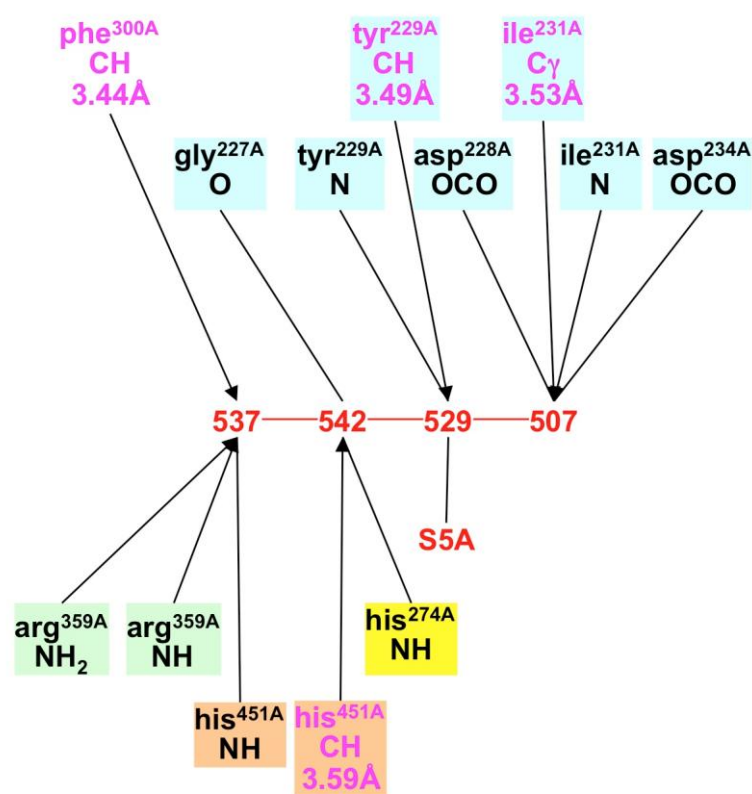

Fig S1. Schematic presentation of the hydrogen bonding of the four water molecules W537, W542, W529, W507 (PDB 3U7Q labels) with S5A and surrounding amino-acids: see Fig 3. Lines are possible hydrogen bonds, similarly coloured residues are in the same chain section, and possible C-H → O hydrogen bonds are marked in magenta.

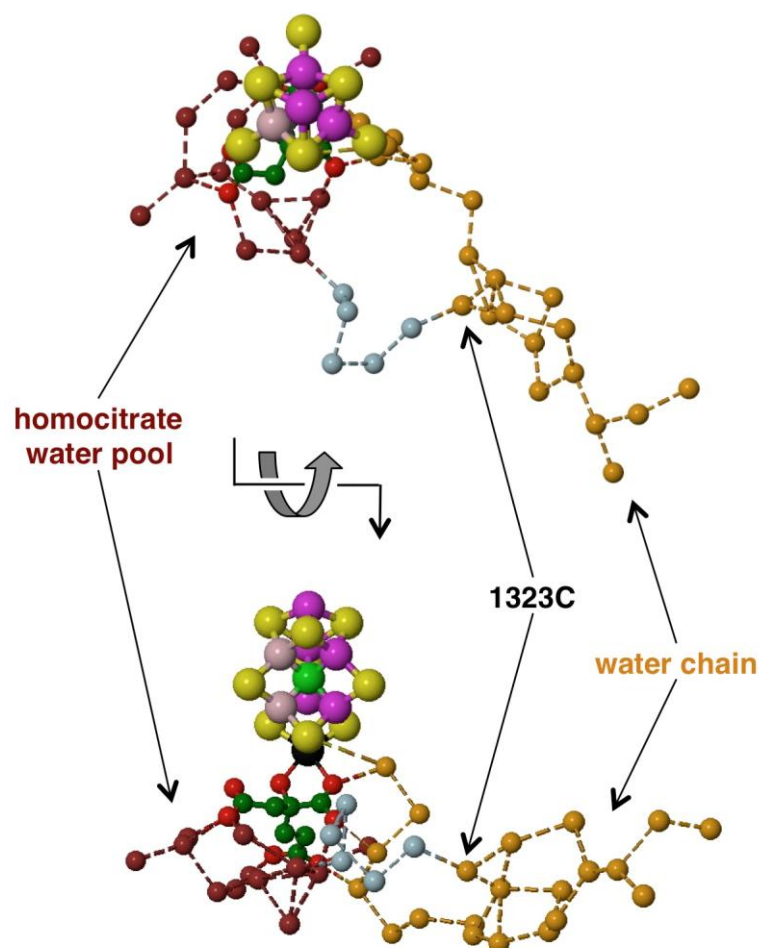

Fig S2. Top and front views of five water molecules, grey, chaining between water 1323C of PDB 3U7Q and the pool of water molecules (dark brown) around homocitrate. This chain is not near the proton wire. Water 1323C is in the branched proton bay section of the water chain.

Supplementary Table T1. Details of the numbering and hydrogen bonding connections of the first nine water molecules in the twelve high quality instances of the water chain

| structure      | W1             | W2             | W3          | W4          | W5          | W6          | W7                         | W8               | insertion | W9             |
|----------------|----------------|----------------|-------------|-------------|-------------|-------------|----------------------------|------------------|-----------|----------------|
|                | Arg C $\gamma$ | Arg C $\alpha$ |             |             |             |             | Arg C $\gamma$ ,C $\delta$ |                  |           | Ala C $\beta$  |
|                | His O          | Arg N          | Gly O       | Arg NH $_2$ | Arg NH      | Gly O       |                            | Ala O            |           |                |
| <b>1M1N #1</b> | <b>679</b>     | <b>15</b>      | <b>259</b>  | <b>24</b>   | <b>50</b>   | <b>370</b>  | <b>120</b>                 | <b>261</b>       |           | <b>1806</b>    |
|                | HCA O5         |                | HCA O6      | HCA O3      | Tyr OH      |             | Val O                      | Val N, Leu N     |           | Leu N          |
|                | Ile C $\delta$ | Ser C $\alpha$ |             |             |             | Tyr ringC   | Val C $\beta$ , Tyr ringC  |                  |           | Asp C $\alpha$ |
|                | Arg C $\gamma$ | Arg C $\alpha$ |             |             |             |             | Arg C $\gamma$ ,C $\delta$ |                  |           | Ala C $\beta$  |
|                | His O          | Arg N          | Gly O       | Arg NH $_2$ | Arg NH      | Gly O       |                            | Ala O            |           |                |
| <b>1M1N #2</b> | <b>381</b>     | <b>363</b>     | <b>533</b>  | <b>86</b>   | <b>53</b>   | <b>271</b>  | <b>59</b>                  | <b>265</b>       |           | <b>1549</b>    |
|                | HCA O5         |                | HCA O6      | HCA O3      | Tyr OH      |             | Val O                      | Val N, Leu N     |           | Leu N          |
|                | Ile C $\delta$ | Ser C $\alpha$ |             |             |             | Tyr ringC   | Val C $\beta$ , Tyr ringC  |                  |           | Asp C $\alpha$ |
|                | Arg C $\gamma$ | Arg C $\alpha$ |             |             |             |             | Arg C $\gamma$ ,C $\delta$ |                  |           | Ala C $\beta$  |
|                | His O          | Arg N          | Gly O       | Arg NH $_2$ | Arg NH      | Gly O       |                            | Ala O            |           |                |
| <b>1M1N #3</b> | <b>3220</b>    | <b>2552</b>    | <b>2796</b> | <b>2561</b> | <b>2587</b> | <b>2909</b> | <b>2657</b>                | <b>2798</b>      |           | <b>4321</b>    |
|                | HCA O5         |                | HCA O6      | HCA O3      | Tyr OH      |             | Val O                      | Val N, Leu N     |           | Leu N          |
|                | Ile C $\delta$ | Ser C $\alpha$ |             |             |             | Tyr ringC   | Val C $\beta$ , Tyr ringC  |                  |           | Asp C $\alpha$ |
|                | Arg C $\gamma$ | Arg C $\alpha$ |             |             |             |             | Arg C $\gamma$ ,C $\delta$ |                  |           | Ala C $\beta$  |
|                | His O          | Arg N          | Gly O       | Arg NH $_2$ | Arg NH      | Gly O       |                            | Ala O            |           |                |
| <b>1M1N #4</b> | <b>2920</b>    | <b>2901</b>    | <b>3072</b> | <b>2623</b> | <b>2590</b> | <b>2808</b> | <b>2596</b>                | <b>2802</b>      |           | <b>4079</b>    |
|                | HCA O5         |                | HCA O6      | HCA O3      | Tyr OH      |             | Val O                      | Val N, Leu N     |           | Leu N          |
|                | Ile C $\delta$ | Ser C $\alpha$ |             |             |             | Tyr ringC   | Val C $\beta$ , Tyr ringC  |                  |           | Asp C $\alpha$ |
|                |                | Arg C $\alpha$ |             |             |             |             | Arg C $\gamma$ ,C $\delta$ | <b>Imid edge</b> |           | Ala C $\beta$  |
|                | His O          | Arg N          | Gly O       | Arg NH $_2$ | Arg NH      | Gly O       |                            | Ala O            |           |                |
| <b>3U7Q #1</b> | <b>519A</b>    | <b>506A</b>    | <b>536A</b> | <b>534A</b> | <b>503A</b> | <b>510A</b> | <b>676D</b>                | <b>511A</b>      |           | <b>698D</b>    |
|                | HCA O5         |                | HCA O6      | HCA O3      | Tyr OH      |             | Val O                      | Leu N            |           | Leu N          |
|                |                | Ser C $\alpha$ |             |             |             | Tyr ringC   | Val C $\beta$ , Tyr ringC  |                  |           | Asp C $\alpha$ |

|                |                |                |               |                     |             |             |                            |              |                                       |
|----------------|----------------|----------------|---------------|---------------------|-------------|-------------|----------------------------|--------------|---------------------------------------|
|                |                | Arg C $\alpha$ |               |                     |             |             | Arg C $\gamma$ ,C $\delta$ |              | Ala C $\beta$                         |
|                | His O          | Arg N          | Gly O         | Arg NH <sub>2</sub> | Arg NH      | Gly O       |                            | Ala O        |                                       |
| <b>3U7Q #2</b> | <b>479C</b>    | <b>514C</b>    | <b>537C</b>   | <b>517C</b>         | <b>522C</b> | <b>521C</b> | <b>657B</b>                | <b>502C</b>  | <b>887B</b>                           |
|                | HCA O5         |                | HCA O6        | HCA O3              | Tyr OH      |             | Val O                      | Val N, Leu N | Leu N                                 |
|                |                | Ser C $\alpha$ | Ser C $\beta$ |                     |             | Tyr ringC   | Val C $\beta$ , Tyr ringC  |              | Asp C $\alpha$                        |
|                |                |                |               |                     |             |             | Arg C $\gamma$ ,C $\delta$ |              |                                       |
|                | His O          | Arg N          | Gly O         | Arg NH <sub>2</sub> | Arg NH      | Gly O       |                            | Ala O        |                                       |
| <b>2AFH #1</b> | <b>99</b>      | <b>265</b>     | <b>309</b>    | <b>1456</b>         | <b>341</b>  | <b>648</b>  | <b>1503</b>                | <b>179</b>   | <b>557</b>                            |
|                | HCA O5         |                | HCA O6        | HCA O3              | Tyr OH      |             | Val O                      | Val N, Leu N | Leu N                                 |
|                |                | Ser C $\alpha$ | Ser C $\beta$ |                     |             |             | Val C $\beta$ , Tyr ringC  |              | Asp C $\alpha$                        |
|                |                |                |               |                     |             |             | Arg C $\gamma$ ,C $\delta$ |              | Ala C $\beta$                         |
|                | His O          | Arg N          | Gly O         | Arg NH <sub>2</sub> | Arg NH      | Gly O       |                            | Ala O        |                                       |
| <b>2AFH #2</b> | <b>259</b>     | <b>96</b>      | <b>1074</b>   | <b>314</b>          | <b>1491</b> | <b>357</b>  | <b>59</b>                  | <b>405</b>   | <b>895</b>                            |
|                | HCA O5         |                | HCA O6        | HCA O3              | Tyr OH      |             | Val O                      | Val N, Leu N | Leu N                                 |
|                |                | Ser C $\alpha$ | Ser C $\beta$ |                     |             |             | Tyr ringC                  |              |                                       |
|                | Arg C $\gamma$ | Arg C $\alpha$ |               |                     |             |             | Arg C $\gamma$ ,C $\delta$ |              |                                       |
|                | His O          | Arg N          | Gly O         | Arg NH <sub>2</sub> | Arg NH      | Gly O       |                            | Ala O        | <b>OCH<sub>2</sub>CH<sub>2</sub>O</b> |
| <b>1QGU #1</b> | <b>10</b>      | <b>12</b>      | <b>9</b>      | <b>609</b>          | <b>7</b>    | <b>23</b>   | <b>1967</b>                | <b>19</b>    | <b>138</b>                            |
|                | HCA O5         |                | HCA O6        | HCA O4*             | Tyr OH      |             | Val O                      | Val N, Leu N | Leu N                                 |
|                |                | Ser C $\alpha$ |               |                     | Tyr ringC   |             | Val C $\beta$ , Tyr ringC  |              | Asp C $\alpha$                        |
|                | Arg C $\gamma$ |                |               |                     |             |             | Arg C $\gamma$ ,C $\delta$ |              |                                       |
|                | His O          | Arg N          | Gly O         | Arg NH <sub>2</sub> | Arg NH      | Gly O       |                            | Ala O        |                                       |
| <b>1QGU #2</b> | <b>1396</b>    | <b>1410</b>    | <b>1393</b>   | <b>1963</b>         | <b>1376</b> | <b>1405</b> | <b>615</b>                 | <b>1384</b>  | <b>802</b>                            |
|                | HCA O5         |                | HCA O6        | HCA O4*             | Tyr OH      |             | Val O                      | Val N        | Val N                                 |
|                |                | Ser C $\alpha$ |               |                     | Tyr ringC   |             | Val C $\beta$ , Tyr ringC  |              | Asp C $\alpha$                        |
|                |                |                |               |                     |             |             | Arg C $\gamma$ ,C $\delta$ |              |                                       |
|                | His O          | Arg N          | Gly O         | Arg NH <sub>2</sub> | Arg NH      | Gly O       |                            | Ala O        | <b>OCH<sub>2</sub>CH<sub>2</sub>O</b> |
| <b>1QH1 #1</b> | <b>13</b>      | <b>12</b>      | <b>2</b>      | <b>584</b>          | <b>3</b>    | <b>17</b>   | <b>1861</b>                | <b>15</b>    | <b>126</b>                            |
|                | HCA O5         |                | HCA O6        | HCA O4*             | Tyr OH      |             | Val O                      | Leu N        | Leu N                                 |
|                |                | Ser C $\alpha$ |               |                     |             |             |                            |              |                                       |

|                |                                    |                |             |                     |             |             |                            |              |             |            |
|----------------|------------------------------------|----------------|-------------|---------------------|-------------|-------------|----------------------------|--------------|-------------|------------|
|                | Arg C $\gamma$ ,<br>Ile C $\delta$ |                |             |                     |             |             | Arg C $\gamma$ ,C $\delta$ |              |             |            |
|                | His O                              | Arg N          | Gly O       | Arg NH <sub>2</sub> | Arg NH      | Gly O       |                            | Ala O        |             |            |
| <b>1QH1 #2</b> | <b>1335</b>                        | <b>1339</b>    | <b>1344</b> | <b>1865</b>         | <b>1311</b> | <b>1346</b> | <b>600</b>                 | <b>1319</b>  | <b>1441</b> | <b>690</b> |
|                | HCA O5                             |                | HCA O6      | HCA O4*             | Tyr OH      |             | Val O                      | Val N, Leu N |             | Leu N      |
|                |                                    | Ser C $\alpha$ |             |                     |             |             | Tyr ringC                  |              |             |            |

\* O3 in Av structures is labelled O4 in crystals 1QGU and 1QH1 of Kp.
